# Supplementary material for: A Begomovirus Nuclear Shuttle Protein-Interacting Immune Hub: Hijacking Host Transport Activities and Suppressing Incompatible Functions
Source: Front Plant Sci. 2020 Apr 8;11:398. doi: 10.3389/fpls.2020.00398 (PMC7156597; doi:10.3389/fpls.2020.00398)
Supplement: Supplementary file 2 [file Table_1.XLSX]

## Sheet: NIG_figura_interactome_revisao.
Supplementary Table 1. Protein-Protein interactions between NSP and Arabidopsis proteins. The colors indicated the hubs displayed in Supplementary Figure 1.
1) NSP (Nuclear Shuttle Protein)
#	Accession	Name	Betweenness centrality	Closeness centrality	Clustering coefficient	Degree	Eccentricity	Description
1	NSP	NSP	0.7398977	0.51492537	0.06666667	11	3	Nuclear Shuttle Protein
2	AT4G13350	NIG	0.0571185	0.34848485	0.0	2	4	NSP-interacting GTPase
3	AT1G32070	NSI	0.19126172	0.39655172	0.2	7	4	Nuclear shuttle interactor (NSI)
4	AT5G10980	H3a	0.0	0.3556701	1.0	2	4	Histone H3
5	AT4G40040	H3b	0.14247656	0.3	0.0	7	5	Histone H3
6	AT5G65360	H3c	0.20880222	0.38764045	0.02222222	11	4	Histone H3
7	AT1G09200	H3d	0.06685848	0.36702128	0.1	6	4	Histone H3
8	AT5G16000	NIK1	0.55882353	0.44230769	0.0	28	4	NSP-Interacting Kinase 1
9	AT1G65620	AS2	0.32860188	0.39204545	0.0	25	4	Assymeetric leaves 2
10	AT5G48650	G3BP	0.11338448	0.3556701	0.0	5	4	GTPase Activating Protein SH3-Domain Binding Protein-Like
11	AT3G24550	NsAK	0.01072038	345	0.0	2	4	NSP-Associated Kinase
12	MP	MP	0.0	0.34158416	0.0	1	4	Movement ptotein
2) NIG (NSP-Iinteracting GTPase),AT4G13350
#	Accession	Name	Betweenness centrality	Closeness centrality	Clustering coefficient	Degree	Eccentricity	Description
1	AT4G13350	NIG	0.0571185	0.34848485	0.0	2	4	NSP-Interacting GTPase
2	AT2G41020	WWP1	0.02898551	0.26136364	0.0	3	5	WW domain-containing protein
3	NSP	NSP	0.7398977	0.51492537	0.06666667	11	3	Nuclear Shuttle Protein
3) WWP1 (WW domain-containing protein), AT2G41020
#	Accession	Name	Betweenness centrality	Closeness centrality	Clustering coefficient	Degree	Eccentricity	Description
1	AT2G41020	WWP1	0.02898551	0.26136364	0.0	3	5	WW domain-containing protein
2	AT5G35330	MBD2	0.0	0.20783133	0.0	2	6	Protein containing methyl-CpG-binding domain.
4) NSI (Nuclear Shuttle Interactor), AT1G32070
#	Accession	Name	Betweenness centrality	Closeness centrality	Clustering coefficient	Degree	Eccentricity	Description
1	AT1G32070	NSI	0.19126172	0.39655172	0.2	7	4	Nuclear Shuttle Interactor (NSI)
2	AT5G10980	H3a	0.0	0.3556701	1.0	2	4	Histone H3
3	AT4G40040	H3b	0.14247656	0.3	0.0	7	5	Histone H3
4	AT5G65360	H3c	0.20880222	0.38764045	0.02222222	11	4	Histone H3
5	AT1G09200	H3d	0.06685848	0.36702128	0.1	6	4	Histone H3
6	NSP	NSP	0.7398977	0.51492537	0.06666667	11	3	Nuclear Shuttle Protein
5) CP (Coat Protein)
#	Accession	Name	Betweenness centrality	Closeness centrality	Clustering coefficient	Degree	Eccentricity	Description
1	CP	CP	0.0	0.28512397	0.0	1	5	Coat protein
2	AT1G32070	NSI	0.19126172	0.39655172	0.2	7	4	Nuclear Shuttle Interactor (NSI)
4) H3a (Histone H3), AT5G10980
#	Accession	Name	Betweenness centrality	Closeness centrality	Clustering coefficient	Degree	Eccentricity	Description
1	AT5G10980	H3a	0.0	0.3556701	1.0	2	4	Histone H3
2	AT1G32070	NSI	0.19126172	0.39655172	0.2	7	4	Nuclear Shuttle Interactor (NSI)
3	NSP	NSP	0.7398977	0.51492537	0.06666667	11	3	Nuclear Shuttle Protein
5) H3b (Histone H3), AT4G40040
#	Accession	Name	Betweenness centrality	Closeness centrality	Clustering coefficient	Degree	Eccentricity	Description
1	AT4G40040	H3b	0.14247656	0.3	0.0	7	5	Histone H3
2	AT5G55390	EDM2	0.0	0.23154362	0.0	1	6	EDM2 (enhanced downy mildew 2). The predicted protein bears typical features of transcriptional regulators.
3	AT1G12530	MOS9	0.0	0.23154362	0.0	1	6	Identified in a screen for suppressors of snc1. Regulator of SNC1 and RPP4 mediated immunity. Interacts with methyltransferase ATXR7.
4	AT2G32700	MUM1	0.0	0.23154362	0.0	1	6	Encodes a WD40 repeat and LUFS domain containing protein that is similar to LUG. Interacts physically with SEUSS and likely functions as part of a repressor complex that represses AG.
5	AT4G32830	AUR1	0.0	0.23154362	0.0	1	6	Encodes a member of a family of Ser/Thr kinases whose activities peak during cell division. Transcripts are abundant in tissues rich in dividing cells like roots and flowers but are low or absent in fully expanded leaves and stems.
6	AT1G73150		0.0	0.23154362	0.0	1	6	Bromodomain and extra terminal domain family protein. Binds to acetyl-histone H3. Binding is reduced when GTE3 is SUMOylated by SIZ1
7	AT1G32070	NSI	0.19126172	0.39655172	0.2	7	4	Nuclear Shuttle Interactor (NSI)
8	NSP	NSP	0.7398977	0.51492537	0.06666667	11	3	Nuclear Shuttle Protein
6) H3c (Histone H3), AT5G65360
#	Accession	Name	Betweenness centrality	Closeness centrality	Clustering coefficient	Degree	Eccentricity	Description
1	AT5G65360	H3c	0.20880222	0.38764045	0.02222222	11	4	Histone H3
2	AT5G03240	UBQ3	0.00170503	0.28278689	0.0	2	5	encodes ubiquitin that is attached to proteins destined for degradation.
3	AT4G09570	CPK4	0.0	0.2804878	0.0	1	5	Encodes a member of Calcium Dependent Protein Kinase (CDPK) gene family.Positive regulator of ABA signaling.
4	AT4G37280	MRG1	0.0	0.2804878	0.0	1	5	MORF RELATED GENE 1, MRG1
5	AT1G02740	MRG2	0.0	0.2804878	0.0	2	5	MORF RELATED GENE 2, MRG2
6	AT1G35670	CDPK2	0.0	0.2804878	0.0	1	5	Encodes a Ca(2+)-dependent, calmodulin-independent protein kinase that is rapidly induced by drought and high-salt stress but not by low-temperature stress or heat stress.
7	AT3G01460	MBD9	0.0	0.2804878	0.0	1	5	Encodes a protein with a methyl-CpG-binding domain. Has sequence similarity to human MBD proteins. Involved in the modification of the FLC chromatin acetylation state to affect FLC expression.
8	AT5G17690	TFL2	0.0	0.2804878	0.0	1	5	Regulates the meristem response to light signals and the maintenance of inflorescence meristem identity. Influences developmental processes controlled by APETALA1.
9	AT5G43990	SUVR2	0.0	0.2804878	0.0	1	5	Encodes SUVR2, one of the four closely related Arabidopsis SUVR proteins that belong to the SU(VAR)3-9 subgroup of SET-domain proteins.
10	AT1G32070	NSI	0.19126172	0.39655172	0.2	7	4	Nuclear Shuttle Interactor (NSI)
11	NSP	NSP	0.7398977	0.51492537	0.06666667	11	3	Nuclear Shuttle Protein
7) H3d (Histone H3), AT1G09200
#	Accession	Name	Betweenness centrality	Closeness centrality	Clustering coefficient	Degree	Eccentricity	Description
1	AT1G09200	H3d	0.06685848	0.36702128	0.1	6	4	Histone H3
2	AT4G12080	ATAHL1	0.00383632	0.28278689	0.0	2	5	AT-hook motif nuclear-localized protein 1
3	AT1G20900	AHL27	0.0	0.26953125	0.0	1	5	Encodes an AT hook domain containing protein that acts redundantly with SOB3 to modulate hypocotyl growth inhibition in response to light.
4	AT1G32070	NSI	0.19126172	0.39655172	0.2	7	4	Nuclear Shuttle Interactor (NSI)
5	NSP	NSP	0.7398977	0.51492537	0.06666667	11	3	Nuclear Shuttle Protein
8) NIK1 (NSP-Interacting Kinase 1), AT5G16000
#	Accession	Name	Betweenness centrality	Closeness centrality	Clustering coefficient	Degree	Eccentricity	Description
1	AT5G16000	NIK1	0.55882353	0.44230769	0.0	28	4	NSP-Interacting Kinase 1
2	AT1G14320	RPL10A	0.0	0.30803571	0.0	1	5	Encodes a ribosomal protein L10 and may be involved in translation regulation.
3	AT5G24100		0.0	0.30803571	0.0	1	5	Leucine-rich repeat protein kinase family protein;
4	AT2G34480	RPL18AB	0.0	0.30803571	0.0	1	5	Encodes a nuclear localized member of the ribosomal L18ae/LX protein family. Loss of function mutations show reduced transmission through the gametophytes and embryo lethality.
5	AT5G46330	FLS2	0.0	0.30803571	0.0	1	5	Encodes a leucine-rich repeat serine/threonine protein kinase that is expressed ubiquitously. FLS2 is involved in MAP kinase signalling relay involved in innate immunity. Essential in the perception of flagellin, a potent elicitor of the defense response.
6	AT4G33430	BAK1	0.0	0.30803571	0.0	1	5	Leu-rich receptor Serine/threonine protein kinase. Component of BR signaling that interacts with BRI1 in vitro and in vivo to form a heterodimer.
7	AT1G06840		0.0	0.30803571	0.0	1	5	Leucine-rich repeat protein kinase family protein
8	AT2G19210		0.0	0.30803571	0.0	1	5	Leucine-rich repeat transmembrane protein kinase protein
9	AT2G27060		0.0	0.30803571	0.0	1	5	Leucine-rich repeat protein kinase family protein;
10	AT3G53590		0.0	0.30803571	0.0	1	5	Leucine-rich repeat protein kinase family protein;
12	AT5G48380	BIR1	0.0	0.30803571	0.0	1	5	Encodes a BAK1-interacting receptor-like kinase named BIR1. Negatively regulates multiple plant resistance signaling pathways, one of which is the SOBIR1(AT2G31880)-dependent pathway.
13	AT1G27190	BIR3	0.0	0.30803571	0.0	1	5	BAK1-INTERACTING RECEPTOR-LIKE KINASE 3, BIR3
14	AT1G69990	BIR4	0.0	0.30803571	0.0	1	5	Leucine-rich repeat protein kinase family protein
15	AT1G55610	BRL1	0.0	0.30803571	0.0	1	5	mutant has Altered vascular cell differentiation; LRR Receptor Kinase
16	AT3G13380	BRL3	0.0	0.30803571	0.0	1	5	Similar to BRI, brassinosteroid receptor protein.
17	AT5G20480	EFR	0.0	0.30803571	0.0	1	5	Encodes a predicted leucine-rich repeat receptor kinase (LRR-RLK). Functions as the receptor for bacterial PAMP (pathogen associated molecular patterns) EF-Tu.
18	AT2G26330	ERECTA	0.0	0.30803571	0.0	1	5	Homologous to receptor protein kinases. Involved in specification of organs originating from the shoot apical meristem.
19	AT5G07180	ERL2	0.0	0.30803571	0.0	1	5	Encodes a receptor-like kinase that, together with ER and ERL1 governs the initial decision of protodermal cells to either divide proliferatively to produce pavement cells or divide asymmetrically to generate stomatal complexes.
20	AT5G65710	HSL2	0.0	0.30803571	0.0	1	5	Encodes a protein controlling the separation step of floral organ abscission.Necessary for pathogen-triggered leaf abscission.
21	AT1G72300	PSY1R	0.0	0.30803571	0.0	1	5	Encodes a leucine-rich repeat receptor kinase (LRR-RK) involved in the perception of PSY1. PSY1 is an 18-aa tyrosine-sulfated glycopeptide encoded by AT5G58650 that promotes cellular proliferat
22	AT1G69270	RPK1	0.0	0.30803571	0.0	1	5	RPK1 is a leucine-rich receptor-like kinase located in the plasma membrane which is upregulated by abscisic acid, dehydration, high salt, low temperature, but not by other plant hormones.
23	AT4G30520	SARK	0.0	0.30803571	0.0	1	5	Encodes SARK (SENESCENCE-ASSOCIATED RECEPTOR-LIKE KINASE). Regulates leaf senescence through synergistic actions of auxin and ethylene
24	AT2G13790	SERK4	0.0	0.30803571	0.0	1	5	somatic embryogenesis receptor-like kinase 4;
25	NSP	NSP	0.7398977	0.51492537	0.06666667	11	3	Nuclear Shuttle Protein
9) AS2 (Assymeetric leaves 2), AT1G65620
#	Accession	Name	Betweenness centrality	Closeness centrality	Clustering coefficient	Degree	Eccentricity	Description
1	AT1G65620	AS2	0.32860188	0.39204545	0.0	25	4	Assymeetric leaves 2
2	AT2G37630	MYB91	0.0	0.28278689	0.0	4	5	Encodes a MYB-domain protein involved in specification of the leaf proximodistal axis. Mutation results in lobed and dissected leaves with a characteristic asymmetry.
3	AT3G44530		0.0	0.28278689	0.0	1	5	Encodes a nuclear localized WD-repeat containing protein involved in negative regulation of knox gene expression via epigenetic mechanism of chromatin re-organization.
4	AT2G30340		0.0	0.28278689	0.0	1	5	Lateral Organ Boundaries domain protein. LOB13 promotes lateral root formation.
5	AT1G53230	PCNA	0.0	0.28278689	0.0	3	5	Encodes a member of a recently identified plant transcription factor family that includes Teosinte branched 1, Cycloidea 1, and proliferating cell nuclear antigen (PCNA) factors,
6	AT3G15030		0.0	0.28278689	0.0	1	5	Arabidopsis thaliana TCP family transcription factor. Regulated by miR319. Involved in heterchronic regulation of leaf differentiation.
7	AT2G31070	TCP10	0.0	0.28278689	0.0	2	5	TCP family protein involved in heterchronic regulation of leaf differentiation
8	AT1G30210	TCP24	0.0	0.28278689	0.0	1	5	TCP family protein involved in heterochronic regulation of leaf differentiation.
9	AT4G18390	TCP2	0.0	0.28278689	0.0	1	5	TEOSINTE BRANCHED 1, cycloidea and PCF transcription factor 2
10	AT4G00220	LBD30	0.0	0.28278689	0.0	3	5	Encodes a protein containing a LOB domain that is expressed in embryos, flower primordium and lateral floral organ boundaries.
11	AT2G23380		0.0	0.28278689	0.0	1	5	Similar to the product of the Polycomb-group gene Enhancer of zeste. Catalytic component of the PRC2 complex
12	AT5G51230	CYR1	0.0	0.28278689	0.0	1	5	Polycomb group protein with zinc finger domain involved in negative regulation of reproductive development.
13	AT5G63090	LOB	0.0	0.28278689	0.0	1	5	LATERAL ORGAN BOUNDARIES, LOB Involved in lateral organ development
14	AT3G20740	FIS3	0.00831202	0.3	0.0	2	5	Encodes a protein similar to the transcriptional regular of the animal Polycomb group and is involved in regulation of establishment of anterior-posterior polar axis in the endosperm and repression of flowering during vegetative phase
15	NSP	NSP	0.7398977	0.51492537	0.06666667	11	3	Nuclear Shuttle Protein
10) G3BP (GTPase Activating Protein SH3-Domain Binding Protein Like), AT5G48650
#	Accession	Name	Betweenness centrality	Closeness centrality	Clustering coefficient	Degree	Eccentricity	Description
1	AT5G48650	G3BP	0.11338448	0.3556701	0.0	5	4	Negative regulator of defense response to Pseudomonas syringae pv. tomato through altered stomatal and apoplastic immunity.
2	AT3G13222	GIP1	0.0	0.26335878	0.0	1	5	Encodes a protein that binds to G-box binding transcription factors and enhances their binding affinities to G-box in vitro.
3	AT1G48630	RACK1B	0.0	0.26335878	0.0	1	5	Encodes a protein with similarity to mammalian RACKs. RACKs function to shuttle activated protein kinase C to different subcellular sites and may also function as a scaffold through physical interactions with other proteins. RACK1B has no phenotype on its own and
4	AT1G13730	NTF2	0.0	0.26335878	0.0	1	5	Nuclear transport factor 2 (NTF2) family protein with RNA binding (RRM-RBD-RNP motifs) domain-containing protein
5	AT1G80670	RAE1	0.0	0.26335878	0.0	1	5	Encode a protein with a DWD motif. It can bind to DDB1a in Y2H assays, and may be involved in the formation of a CUL4-based E3 ubiquitin ligase
6	NSP	NSP	0.7398977	0.51492537	0.06666667	11	3	Nuclear Shuttle Protein
10) NsAK (NSP-Associated Kinase), AT3G24550
#	Accession	Name	Betweenness centrality	Closeness centrality	Clustering coefficient	Degree	Eccentricity	Description
1	AT3G24550	NsAK	0.01072038	345	0.0	2	4	NSP associated Kinase
2	AT5G03240	UBQ3	0.00170503	0.28278689	0.0	2	5	encodes ubiquitin that is attached to proteins destined for degradation.
3	NSP	NSP	0.7398977	0.51492537	0.06666667	11	3	Nuclear Shuttle Protein
11) Movement Protein (MP)
#	Accession	Name	Betweenness centrality	Closeness centrality	Clustering coefficient	Degree	Eccentricity	Description
1	MP	MP	0.0	0.34158416	0.0	1	4	Movement protein
2	NSP	NSP	0.7398977	0.51492537	0.06666667	11	3	Nuclear Shuttle Protein
3	AT5G10980	H3a	0.0	0.3556701	1.0	2	4	Histone H3
4	AT4G40040	H3b	0.14247656	0.3	0.0	7	5	Histone H3
5	AT5G65360	H3c	0.20880222	0.38764045	0.02222222	11	4	Histone H3
6	AT1G09200	H3d	0.06685848	0.36702128	0.1	6	4	Histone H3
